# Supplementary material for: Los Colegios Profesionales de Ingenieros Agrónomos e Ingenieros Técnicos Agrónomos
Source: Royal Society of Chemistry journal article supplement (doi:10.1039/d0cp04423g), 2014-01-01
Supplement: d0cp04423g1.pdf [file d0cp04423g1.pdf]

## Supplementary Information

### Accurate Equilibrium Structure of 3-Aminophthalimide from Gas Electron Diffraction and Coupled-Cluster Computations and Diverse Structural Effects due to Electron Density Transfer

Natalja Vogt <sup>\*a,b</sup>, Denis S. Savelev<sup>a,c</sup>, Nina I. Giricheva<sup>d</sup>,

Georgiy V. Girichev <sup>c</sup>

<sup>a</sup> Section of Chemical Information Systems, Faculty of Sciences, University of Ulm,  
89069 Ulm, Germany

<sup>b</sup> Department of Chemistry, Lomonosov Moscow State University, 119992 Moscow, Russia

<sup>c</sup> Department of Physics, Ivanovo State University of Chemical Technology, 153025 Ivanovo,  
Russia

<sup>d</sup> Department of Organic and Physical Chemistry, Ivanovo State University, 153000 Ivanovo,  
Russia

\* Corresponding author

E-mail address: [natalja.vogt@uni-ulm.de](mailto:natalja.vogt@uni-ulm.de)

Table S1. Relative intensities of ions in mass spectrum of the vapor over solid 3-ApHI

| Ions <sup>a</sup>                                                               | m/e, u <sup>a</sup> | <i>I</i> <sub>rel</sub> , % |
|---------------------------------------------------------------------------------|---------------------|-----------------------------|
| C <sub>6</sub> H <sub>3</sub> NH(C=O) <sub>2</sub> NH <sub>2</sub> <sup>+</sup> | 162                 | 85                          |
| C <sub>6</sub> H <sub>4</sub> NH(C=O) <sup>+</sup>                              | 119                 | 12                          |
| C <sub>6</sub> H <sub>3</sub> NH(C=O) <sup>+</sup>                              | 118                 | 25                          |
| C <sub>6</sub> H <sub>2</sub> NH(C=O) <sup>+</sup>                              | 117                 | 8                           |
| C <sub>6</sub> H <sub>3</sub> NH <sub>2</sub> <sup>+</sup>                      | 91                  | 100                         |
| C <sub>6</sub> H <sub>2</sub> NH <sub>2</sub> <sup>+</sup>                      | 90                  | 10                          |
| C <sub>5</sub> H <sub>5</sub> <sup>+</sup>                                      | 65                  | 23                          |
| C <sub>5</sub> H <sub>4</sub> <sup>+</sup>                                      | 64                  | 27                          |
| C <sub>5</sub> H <sub>3</sub> <sup>+</sup>                                      | 63                  | 31                          |
| C <sub>5</sub> H <sub>2</sub> <sup>+</sup>                                      | 62                  | 16                          |
| C <sub>4</sub> H <sub>4</sub> <sup>+</sup>                                      | 52                  | 15                          |

<sup>a</sup> Ions with relative intensity higher than 5%.

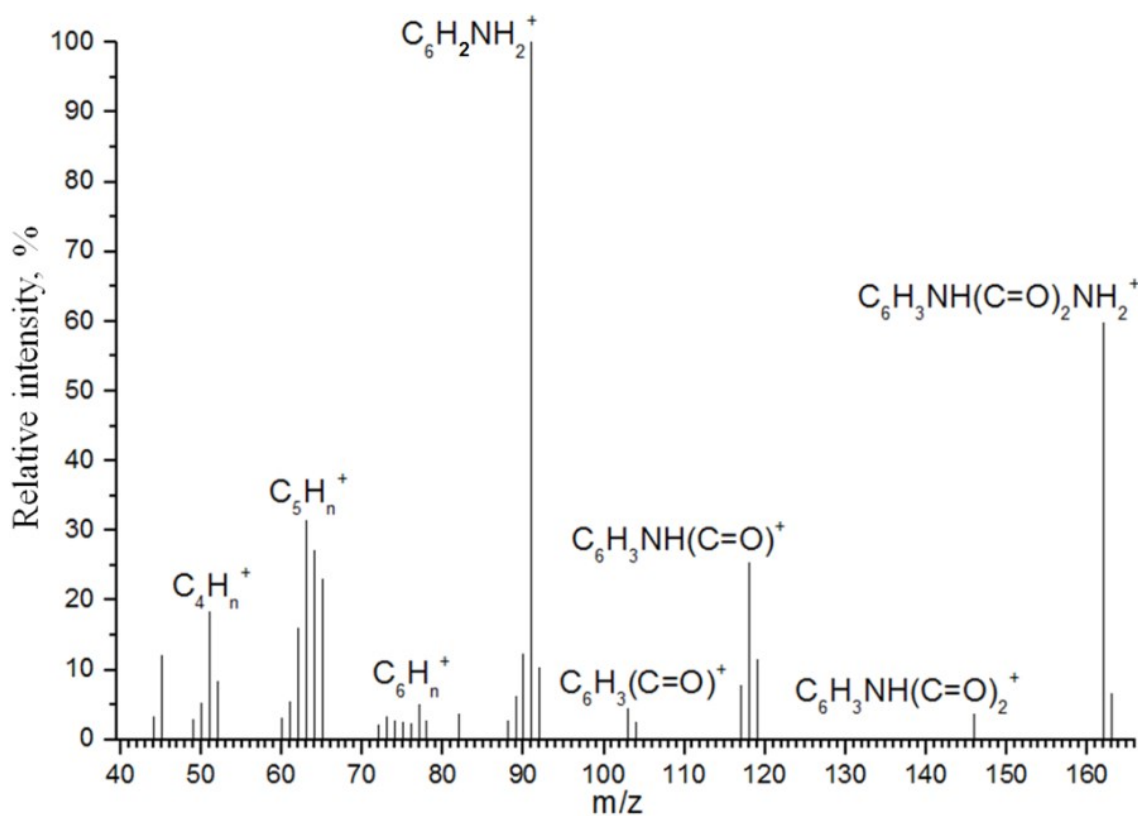

Figure S1. Mass spectrum of 3-ApHI

Table S2. Experimental intensities  $I(s)$  of 3-aminophthalimide (3-APhI) with background  $G(s)$ .

a) Long nozzle-to-film distance ( $L = 598$  mm)

| $s, \text{\AA}^{-1}$ | $I(s)$  | $G(s)$  |
|----------------------|---------|---------|
| 1.2                  | 2.78913 | 2.17047 |
| 1.3                  | 2.37112 | 1.9168  |
| 1.4                  | 1.97594 | 1.69815 |
| 1.5                  | 1.68626 | 1.52121 |
| 1.6                  | 1.47316 | 1.37035 |
| 1.7                  | 1.28837 | 1.25083 |
| 1.8                  | 1.13465 | 1.15115 |
| 1.9                  | 1.00792 | 1.06581 |
| 2.0                  | 0.90261 | 0.99112 |
| 2.1                  | 0.81521 | 0.92742 |
| 2.2                  | 0.74644 | 0.87295 |
| 2.3                  | 0.69266 | 0.82395 |
| 2.4                  | 0.65493 | 0.78032 |
| 2.5                  | 0.63157 | 0.74361 |
| 2.6                  | 0.6137  | 0.70981 |
| 2.7                  | 0.6047  | 0.68342 |
| 2.8                  | 0.59832 | 0.66141 |
| 2.9                  | 0.59332 | 0.64423 |
| 3.0                  | 0.59054 | 0.63053 |
| 3.1                  | 0.58326 | 0.61998 |
| 3.2                  | 0.57126 | 0.61073 |
| 3.3                  | 0.55347 | 0.60304 |
| 3.4                  | 0.53458 | 0.59573 |
| 3.5                  | 0.51124 | 0.58947 |
| 3.6                  | 0.48767 | 0.58396 |
| 3.7                  | 0.46999 | 0.57931 |
| 3.8                  | 0.45357 | 0.57473 |
| 3.9                  | 0.44115 | 0.57064 |
| 4.0                  | 0.43156 | 0.56648 |
| 4.1                  | 0.42424 | 0.56256 |
| 4.2                  | 0.42046 | 0.55876 |
| 4.3                  | 0.41889 | 0.55501 |
| 4.4                  | 0.41957 | 0.55115 |
| 4.5                  | 0.42318 | 0.54736 |
| 4.6                  | 0.42833 | 0.54352 |
| 4.7                  | 0.43886 | 0.5397  |
| 4.8                  | 0.45445 | 0.53598 |
| 4.9                  | 0.47404 | 0.53224 |
| 5.0                  | 0.49965 | 0.52867 |
| 5.1                  | 0.53159 | 0.52517 |

|     |         |         |
|-----|---------|---------|
| 5.2 | 0.56523 | 0.52151 |
| 5.3 | 0.5988  | 0.51803 |
| 5.4 | 0.62983 | 0.51444 |
| 5.5 | 0.65621 | 0.51077 |
| 5.6 | 0.67424 | 0.50718 |
| 5.7 | 0.68245 | 0.50343 |
| 5.8 | 0.6805  | 0.49966 |
| 5.9 | 0.66941 | 0.4958  |
| 6.0 | 0.64936 | 0.49199 |
| 6.1 | 0.6244  | 0.48825 |
| 6.2 | 0.5933  | 0.48458 |
| 6.3 | 0.56227 | 0.48082 |
| 6.4 | 0.53352 | 0.47725 |
| 6.5 | 0.50535 | 0.4734  |
| 6.6 | 0.48045 | 0.46966 |
| 6.7 | 0.46027 | 0.46607 |
| 6.8 | 0.44383 | 0.4624  |
| 6.9 | 0.43154 | 0.45873 |
| 7.0 | 0.4204  | 0.45526 |
| 7.1 | 0.41194 | 0.45177 |
| 7.2 | 0.40291 | 0.44823 |
| 7.3 | 0.3965  | 0.44471 |
| 7.4 | 0.38953 | 0.44133 |
| 7.5 | 0.38384 | 0.43798 |
| 7.6 | 0.37898 | 0.4346  |
| 7.7 | 0.37498 | 0.43122 |
| 7.8 | 0.37306 | 0.42798 |
| 7.9 | 0.37306 | 0.4248  |
| 8.0 | 0.37543 | 0.4217  |
| 8.1 | 0.37844 | 0.41867 |
| 8.2 | 0.38455 | 0.41554 |
| 8.3 | 0.39146 | 0.41253 |
| 8.4 | 0.39887 | 0.40955 |
| 8.5 | 0.40579 | 0.40664 |
| 8.6 | 0.41011 | 0.40368 |
| 8.7 | 0.41307 | 0.40086 |
| 8.8 | 0.41289 | 0.39817 |
| 8.9 | 0.4106  | 0.39543 |
| 9.0 | 0.40611 | 0.39283 |
| 9.1 | 0.4008  | 0.39032 |
| 9.2 | 0.39447 | 0.38787 |
| 9.3 | 0.38897 | 0.38549 |
| 9.4 | 0.38337 | 0.38321 |
| 9.5 | 0.37877 | 0.38101 |
| 9.6 | 0.37484 | 0.37885 |
| 9.7 | 0.37192 | 0.37668 |

|      |         |         |
|------|---------|---------|
| 9.8  | 0.3708  | 0.37459 |
| 9.9  | 0.36925 | 0.37245 |
| 10.0 | 0.36759 | 0.37041 |
| 10.1 | 0.36795 | 0.36845 |
| 10.2 | 0.36894 | 0.36656 |
| 10.3 | 0.37066 | 0.36467 |
| 10.4 | 0.37219 | 0.36277 |
| 10.5 | 0.37521 | 0.3609  |
| 10.6 | 0.3784  | 0.35903 |
| 10.7 | 0.38082 | 0.35714 |
| 10.8 | 0.38198 | 0.35531 |
| 10.9 | 0.38103 | 0.35342 |
| 11.0 | 0.3788  | 0.35163 |
| 11.1 | 0.37513 | 0.34983 |
| 11.2 | 0.369   | 0.34813 |
| 11.3 | 0.3619  | 0.34641 |
| 11.4 | 0.35426 | 0.34475 |
| 11.5 | 0.34642 | 0.34309 |
| 11.6 | 0.33805 | 0.34149 |
| 11.7 | 0.33173 | 0.33996 |
| 11.8 | 0.32592 | 0.33843 |
| 11.9 | 0.32152 | 0.33696 |
| 12.0 | 0.31844 | 0.33551 |
| 12.1 | 0.31578 | 0.33414 |
| 12.2 | 0.31366 | 0.33279 |
| 12.3 | 0.31182 | 0.33152 |
| 12.4 | 0.31062 | 0.33025 |
| 12.5 | 0.30918 | 0.32904 |
| 12.6 | 0.30815 | 0.32787 |
| 12.7 | 0.30744 | 0.32673 |
| 12.8 | 0.30769 | 0.32566 |
| 12.9 | 0.3084  | 0.32457 |
| 13.0 | 0.31001 | 0.32349 |
| 13.1 | 0.31223 | 0.32241 |
| 13.2 | 0.31547 | 0.32137 |
| 13.3 | 0.31897 | 0.32035 |
| 13.4 | 0.32279 | 0.3193  |
| 13.5 | 0.32639 | 0.31829 |
| 13.6 | 0.32917 | 0.3173  |
| 13.7 | 0.33081 | 0.31636 |
| 13.8 | 0.33167 | 0.31545 |
| 13.9 | 0.33146 | 0.31458 |
| 14.0 | 0.33032 | 0.31373 |
| 14.1 | 0.32849 | 0.31295 |
| 14.2 | 0.32645 | 0.31224 |
| 14.3 | 0.32423 | 0.3116  |

|      |         |         |
|------|---------|---------|
| 14.4 | 0.32215 | 0.31102 |
| 14.5 | 0.32036 | 0.31057 |

b) Short nozzle-to-film distance ( $L = 338$  mm)

| $s, \text{\AA}^{-1}$ | $I(s)$  | $G(s)$  |
|----------------------|---------|---------|
| 3.2                  | 2.85443 | 3.01377 |
| 3.3                  | 2.64278 | 2.85994 |
| 3.4                  | 2.46073 | 2.73339 |
| 3.5                  | 2.29126 | 2.61684 |
| 3.6                  | 2.13789 | 2.50694 |
| 3.7                  | 2.00463 | 2.40222 |
| 3.8                  | 1.87387 | 2.3015  |
| 3.9                  | 1.76731 | 2.20627 |
| 4.0                  | 1.66814 | 2.11623 |
| 4.1                  | 1.58679 | 2.02649 |
| 4.2                  | 1.50829 | 1.94539 |
| 4.3                  | 1.44405 | 1.86477 |
| 4.4                  | 1.39249 | 1.78911 |
| 4.5                  | 1.36014 | 1.71663 |
| 4.6                  | 1.33176 | 1.64622 |
| 4.7                  | 1.31076 | 1.58092 |
| 4.8                  | 1.30002 | 1.51892 |
| 4.9                  | 1.30656 | 1.45997 |
| 5.0                  | 1.32815 | 1.40575 |
| 5.1                  | 1.36072 | 1.35254 |
| 5.2                  | 1.39805 | 1.30466 |
| 5.3                  | 1.43339 | 1.2599  |
| 5.4                  | 1.46226 | 1.21859 |
| 5.5                  | 1.47694 | 1.17878 |
| 5.6                  | 1.47794 | 1.1428  |
| 5.7                  | 1.45778 | 1.11029 |
| 5.8                  | 1.42322 | 1.08029 |
| 5.9                  | 1.37832 | 1.05136 |
| 6.0                  | 1.3137  | 1.02453 |
| 6.1                  | 1.24016 | 0.9984  |
| 6.2                  | 1.16787 | 0.97286 |
| 6.3                  | 1.08961 | 0.94913 |
| 6.4                  | 1.02241 | 0.92613 |
| 6.5                  | 0.95942 | 0.90364 |
| 6.6                  | 0.90191 | 0.88233 |
| 6.7                  | 0.85344 | 0.86279 |
| 6.8                  | 0.81072 | 0.84263 |
| 6.9                  | 0.77701 | 0.82406 |
| 7.0                  | 0.74816 | 0.80592 |
| 7.1                  | 0.72333 | 0.78907 |
| 7.2                  | 0.69945 | 0.77227 |

|      |         |         |
|------|---------|---------|
| 7.3  | 0.67895 | 0.75653 |
| 7.4  | 0.6625  | 0.7418  |
| 7.5  | 0.64679 | 0.72692 |
| 7.6  | 0.63121 | 0.71351 |
| 7.7  | 0.61787 | 0.7006  |
| 7.8  | 0.60812 | 0.68821 |
| 7.9  | 0.60147 | 0.67636 |
| 8.0  | 0.59894 | 0.66522 |
| 8.1  | 0.59917 | 0.65482 |
| 8.2  | 0.6021  | 0.64472 |
| 8.3  | 0.6063  | 0.63533 |
| 8.4  | 0.61187 | 0.62617 |
| 8.5  | 0.61552 | 0.61733 |
| 8.6  | 0.61754 | 0.60883 |
| 8.7  | 0.61659 | 0.60033 |
| 8.8  | 0.61395 | 0.59302 |
| 8.9  | 0.60873 | 0.58538 |
| 9.0  | 0.59956 | 0.57817 |
| 9.1  | 0.58873 | 0.57145 |
| 9.2  | 0.57674 | 0.56489 |
| 9.3  | 0.56489 | 0.55867 |
| 9.4  | 0.5548  | 0.55253 |
| 9.5  | 0.54644 | 0.54685 |
| 9.6  | 0.53747 | 0.54104 |
| 9.7  | 0.53007 | 0.5356  |
| 9.8  | 0.5237  | 0.53013 |
| 9.9  | 0.5200  | 0.52478 |
| 10.0 | 0.51508 | 0.51953 |
| 10.1 | 0.51131 | 0.51445 |
| 10.2 | 0.50955 | 0.50977 |
| 10.3 | 0.51015 | 0.50517 |
| 10.4 | 0.5111  | 0.50075 |
| 10.5 | 0.51223 | 0.49636 |
| 10.6 | 0.51326 | 0.49188 |
| 10.7 | 0.51452 | 0.48776 |
| 10.8 | 0.51455 | 0.48345 |
| 10.9 | 0.51324 | 0.47926 |
| 11.0 | 0.50909 | 0.47521 |
| 11.1 | 0.50221 | 0.47134 |
| 11.2 | 0.49405 | 0.46735 |
| 11.3 | 0.48314 | 0.46346 |
| 11.4 | 0.47072 | 0.45959 |
| 11.5 | 0.45945 | 0.45561 |
| 11.6 | 0.4489  | 0.45191 |
| 11.7 | 0.43901 | 0.44832 |
| 11.8 | 0.42898 | 0.44491 |

|      |         |         |
|------|---------|---------|
| 11.9 | 0.42216 | 0.44155 |
| 12.0 | 0.41776 | 0.43823 |
| 12.1 | 0.41287 | 0.43508 |
| 12.2 | 0.40946 | 0.43218 |
| 12.3 | 0.4061  | 0.4293  |
| 12.4 | 0.40291 | 0.42649 |
| 12.5 | 0.4012  | 0.4238  |
| 12.6 | 0.39836 | 0.4214  |
| 12.7 | 0.39697 | 0.41905 |
| 12.8 | 0.39549 | 0.41671 |
| 12.9 | 0.39484 | 0.41441 |
| 13.0 | 0.39608 | 0.41234 |
| 13.1 | 0.39776 | 0.41032 |
| 13.2 | 0.400   | 0.40826 |
| 13.3 | 0.40328 | 0.40636 |
| 13.4 | 0.40727 | 0.40446 |
| 13.5 | 0.41029 | 0.40257 |
| 13.6 | 0.41323 | 0.40073 |
| 13.7 | 0.41507 | 0.39892 |
| 13.8 | 0.41622 | 0.39717 |
| 13.9 | 0.41569 | 0.3954  |
| 14.0 | 0.41373 | 0.39366 |
| 14.1 | 0.41067 | 0.39196 |
| 14.2 | 0.40781 | 0.39021 |
| 14.3 | 0.40373 | 0.38842 |
| 14.4 | 0.39956 | 0.3867  |
| 14.5 | 0.39565 | 0.38495 |
| 14.6 | 0.39148 | 0.38316 |
| 14.7 | 0.38787 | 0.38146 |
| 14.8 | 0.38354 | 0.3798  |
| 14.9 | 0.37947 | 0.37815 |
| 15.0 | 0.37676 | 0.37653 |
| 15.1 | 0.37291 | 0.37493 |
| 15.2 | 0.37056 | 0.37339 |
| 15.3 | 0.36719 | 0.37182 |
| 15.4 | 0.36426 | 0.37035 |
| 15.5 | 0.3622  | 0.36883 |
| 15.6 | 0.36075 | 0.36733 |
| 15.7 | 0.3591  | 0.36592 |
| 15.8 | 0.35874 | 0.36456 |
| 15.9 | 0.35813 | 0.36322 |
| 16.0 | 0.35734 | 0.36199 |
| 16.1 | 0.35727 | 0.36073 |
| 16.2 | 0.35716 | 0.35944 |
| 16.3 | 0.35674 | 0.35825 |
| 16.4 | 0.3558  | 0.35715 |



|      |         |         |
|------|---------|---------|
| 16.5 | 0.35506 | 0.35607 |
| 16.6 | 0.3539  | 0.35495 |
| 16.7 | 0.35216 | 0.35392 |
| 16.8 | 0.35128 | 0.35293 |
| 16.9 | 0.34866 | 0.35195 |
| 17.0 | 0.34658 | 0.35101 |
| 17.1 | 0.34528 | 0.35007 |
| 17.2 | 0.34346 | 0.34915 |
| 17.3 | 0.34124 | 0.34823 |
| 17.4 | 0.34034 | 0.34733 |
| 17.5 | 0.33909 | 0.34644 |
| 17.6 | 0.33827 | 0.34558 |
| 17.7 | 0.33865 | 0.3448  |
| 17.8 | 0.33927 | 0.34402 |
| 17.9 | 0.34048 | 0.34323 |
| 18.0 | 0.34124 | 0.34249 |
| 18.1 | 0.34262 | 0.34174 |
| 18.2 | 0.34331 | 0.34104 |
| 18.3 | 0.345   | 0.34037 |
| 18.4 | 0.34683 | 0.33972 |
| 18.5 | 0.3469  | 0.33907 |
| 18.6 | 0.34722 | 0.33847 |
| 18.7 | 0.34682 | 0.33785 |
| 18.8 | 0.34647 | 0.33726 |
| 18.9 | 0.34571 | 0.33666 |
| 19.0 | 0.34515 | 0.33608 |
| 19.1 | 0.34359 | 0.33551 |
| 19.2 | 0.34231 | 0.33494 |
| 19.3 | 0.3413  | 0.33437 |
| 19.4 | 0.34011 | 0.33381 |
| 19.5 | 0.33792 | 0.33326 |
| 19.6 | 0.33606 | 0.33273 |
| 19.7 | 0.33347 | 0.3322  |
| 19.8 | 0.3321  | 0.33167 |
| 19.9 | 0.32962 | 0.33117 |
| 20.0 | 0.32819 | 0.33067 |
| 20.1 | 0.32652 | 0.33016 |
| 20.2 | 0.32445 | 0.32968 |
| 20.3 | 0.32221 | 0.32924 |
| 20.4 | 0.32143 | 0.32878 |
| 20.5 | 0.32098 | 0.32835 |
| 20.6 | 0.31998 | 0.32789 |
| 20.7 | 0.31978 | 0.32748 |
| 20.8 | 0.32001 | 0.32705 |
| 20.9 | 0.32042 | 0.32662 |
| 21.0 | 0.32042 | 0.32622 |

|      |         |         |
|------|---------|---------|
| 21.1 | 0.32057 | 0.32583 |
| 21.2 | 0.32084 | 0.32543 |
| 21.3 | 0.32111 | 0.32503 |
| 21.4 | 0.32133 | 0.32465 |
| 21.5 | 0.32154 | 0.32428 |
| 21.6 | 0.32205 | 0.3239  |
| 21.7 | 0.32276 | 0.32352 |
| 21.8 | 0.32314 | 0.32312 |
| 21.9 | 0.32395 | 0.32275 |
| 22.0 | 0.32447 | 0.32238 |
| 22.1 | 0.32482 | 0.32201 |
| 22.2 | 0.3253  | 0.32164 |
| 22.3 | 0.32519 | 0.32127 |
| 22.4 | 0.32504 | 0.32092 |
| 22.5 | 0.32453 | 0.32055 |
| 22.6 | 0.32408 | 0.32019 |
| 22.7 | 0.32293 | 0.31985 |
| 22.8 | 0.32212 | 0.3195  |
| 22.9 | 0.32125 | 0.31915 |
| 23.0 | 0.32079 | 0.31882 |
| 23.1 | 0.32098 | 0.31849 |
| 23.2 | 0.32074 | 0.31818 |
| 23.3 | 0.32084 | 0.31786 |
| 23.4 | 0.32046 | 0.31758 |
| 23.5 | 0.32025 | 0.31729 |
| 23.6 | 0.32051 | 0.31702 |
| 23.7 | 0.3203  | 0.31675 |
| 23.8 | 0.31942 | 0.3165  |
| 23.9 | 0.31938 | 0.31625 |
| 24.0 | 0.31847 | 0.31603 |
| 24.1 | 0.31798 | 0.3158  |
| 24.2 | 0.31667 | 0.31559 |
| 24.3 | 0.31603 | 0.3154  |
| 24.4 | 0.31571 | 0.31521 |
| 24.5 | 0.31493 | 0.31504 |
| 24.6 | 0.31348 | 0.31486 |
| 24.7 | 0.31294 | 0.31471 |
| 24.8 | 0.31195 | 0.31456 |
| 24.9 | 0.31115 | 0.31442 |
| 25.0 | 0.31023 | 0.31427 |
| 25.1 | 0.30938 | 0.31415 |
| 25.2 | 0.3091  | 0.31403 |
| 25.3 | 0.30886 | 0.31391 |
| 25.4 | 0.30914 | 0.31381 |
| 25.5 | 0.30969 | 0.31372 |
| 25.6 | 0.30984 | 0.31363 |

|      |         |         |
|------|---------|---------|
| 25.7 | 0.30968 | 0.31356 |
| 25.8 | 0.30961 | 0.31349 |
| 25.9 | 0.31032 | 0.31343 |
| 26.0 | 0.31068 | 0.31338 |
| 26.1 | 0.3107  | 0.31333 |
| 26.2 | 0.311   | 0.31329 |
| 26.3 | 0.31121 | 0.31325 |
| 26.4 | 0.31125 | 0.31323 |
| 26.5 | 0.31181 | 0.31321 |
| 26.6 | 0.31268 | 0.3132  |
| 26.7 | 0.31396 | 0.3132  |
| 26.8 | 0.31435 | 0.31321 |
| 26.9 | 0.31532 | 0.31322 |
| 27.0 | 0.3158  | 0.31325 |
| 27.1 | 0.31698 | 0.31329 |
| 27.2 | 0.31755 | 0.31335 |
| 27.3 | 0.31772 | 0.31341 |
| 27.4 | 0.31782 | 0.31349 |
| 27.5 | 0.3181  | 0.31359 |
| 27.6 | 0.31849 | 0.3137  |
| 27.7 | 0.31883 | 0.31383 |
| 27.8 | 0.31871 | 0.31397 |
| 27.9 | 0.31843 | 0.31409 |
| 28.0 | 0.3184  | 0.31425 |
| 28.1 | 0.31778 | 0.31441 |
| 28.2 | 0.31731 | 0.31459 |
| 28.3 | 0.31723 | 0.31476 |
| 28.4 | 0.3169  | 0.31494 |
| 28.5 | 0.31647 | 0.31514 |
| 28.6 | 0.31651 | 0.31534 |
| 28.7 | 0.31646 | 0.31557 |
| 28.8 | 0.31602 | 0.31577 |
| 28.9 | 0.31601 | 0.316   |
| 29.0 | 0.31597 | 0.31622 |
| 29.1 | 0.31573 | 0.31645 |

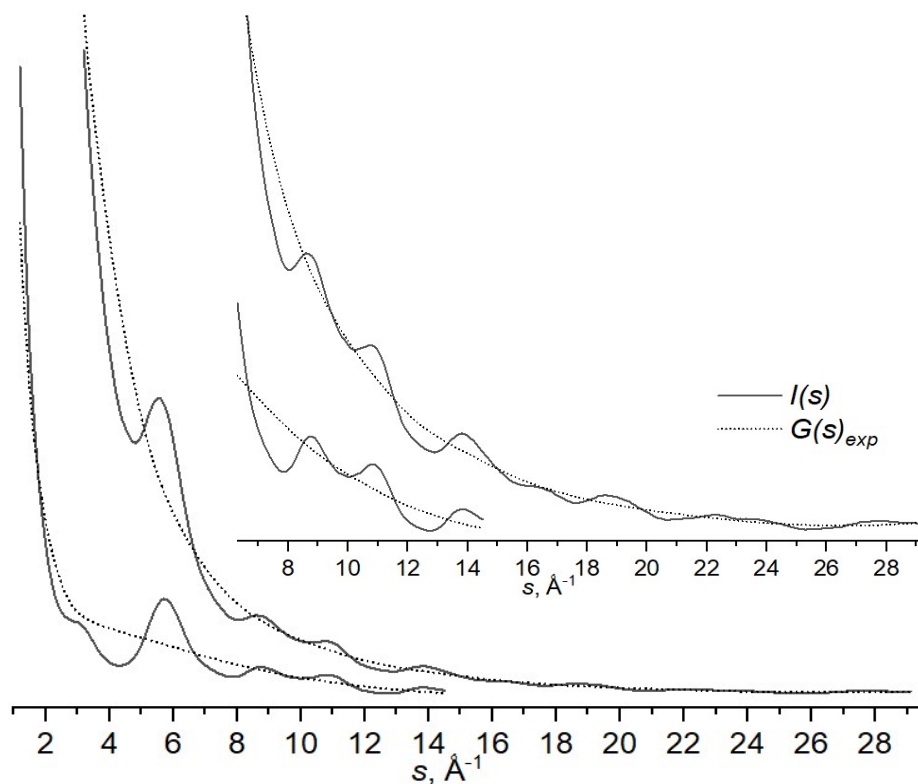

Figure S2. Experimental intensity curves  $I_{\text{tot}}(s)$  (solid lines) for 3-APhI with background  $G(s)$  (dot lines) at the long (below) and short (above) nozzle-to film distances

Table S3. Conditions of the synchronous GED/MS experiments

|                                                                                    |                      |                      |
|------------------------------------------------------------------------------------|----------------------|----------------------|
| Camera distance, mm                                                                | 338                  | 598                  |
| Electron beam current, $\mu\text{A}$                                               | 1.39                 | 0.61                 |
| Effusion cell temperature, K                                                       | 413(5)               | 414(5)               |
| Accelerating voltage, kV                                                           | 84                   | 84                   |
| Ionizing voltage, V                                                                | 50                   | 50                   |
| Exposure time, s                                                                   | 90                   | 90                   |
| Residual pressure in diffraction chamber, Torr                                     | $2.2 \times 10^{-6}$ | $2.5 \times 10^{-6}$ |
| Range of scattering variables, $s_{\text{min}}-s_{\text{max}}$ , $\text{\AA}^{-1}$ | 3.2–29.1             | 1.2–14.5             |

Table S4. Geometrical parameters of 3-APhI computed at different levels of theory (bond lengths in Å, angles in degrees)

| Parameters                  | CCSD(T)/cc-pVTZ | MP2_ae/cc-pwCVTZ | MP2/cc-pwCVTZ | MP2/cc-pVQZ | MP2/cc-pVTZ | B3LYP/cc-pVTZ | B2PLYP/cc-pVTZ |
|-----------------------------|-----------------|------------------|---------------|-------------|-------------|---------------|----------------|
| $r(\text{C4-C3a})$          | 1.3960          | 1.3898           | 1.3926        | 1.3922      | 1.3941      | 1.3970        | 1.3956         |
| $r(\text{C3a-C7a})$         | 1.3971          | 1.3888           | 1.3917        | 1.3916      | 1.3932      | 1.3937        | 1.3935         |
| $r(\text{C7a-C7})$          | 1.3828          | 1.3781           | 1.3810        | 1.3805      | 1.3827      | 1.3766        | 1.3781         |
| $r(\text{C7-C6})$           | 1.4076          | 1.3959           | 1.3987        | 1.3983      | 1.4003      | 1.4020        | 1.4024         |
| $r(\text{C6-C5})$           | 1.3944          | 1.3886           | 1.3916        | 1.3910      | 1.3933      | 1.3852        | 1.3879         |
| $r(\text{C3-C3a})$          | 1.4791          | 1.4704           | 1.4736        | 1.4724      | 1.4746      | 1.4707        | 1.4711         |
| $r(\text{C1-C7a})$          | 1.4981          | 1.4846           | 1.4877        | 1.4873      | 1.4886      | 1.4955        | 1.4933         |
| $r(\text{N2-C3})$           | 1.3969          | 1.3888           | 1.3914        | 1.3902      | 1.3925      | 1.3969        | 1.3954         |
| $r(\text{N2-H2})$           | 1.0070          | 1.0062           | 1.0071        | 1.0068      | 1.0076      | 1.0070        | 1.0064         |
| $r(\text{O1=C1})$           | 1.2091          | 1.2084           | 1.2103        | 1.2094      | 1.2117      | 1.2057        | 1.2084         |
| $r(\text{O3=C3})$           | 1.2170          | 1.2154           | 1.2172        | 1.2163      | 1.2186      | 1.2150        | 1.2171         |
| $r(\text{C7-H7})$           | 1.0813          | 1.0788           | 1.0801        | 1.0797      | 1.0802      | 1.0798        | 1.0789         |
| $r(\text{C6-H6})$           | 1.0832          | 1.0802           | 1.0815        | 1.0810      | 1.0816      | 1.0820        | 1.0808         |
| $r(\text{C5-H5})$           | 1.0842          | 1.0815           | 1.0829        | 1.0824      | 1.0830      | 1.0828        | 1.0819         |
| $r(\text{N4-C4})$           | 1.3787          | 1.3684           | 1.3719        | 1.3692      | 1.3731      | 1.3630        | 1.3668         |
| $r(\text{N4-H9})$           | 1.0062          | 1.0033           | 1.0045        | 1.0036      | 1.0050      | 1.0033        | 1.0032         |
| $r(\text{N4-H8})$           | 1.0101          | 1.0074           | 1.0086        | 1.0080      | 1.0091      | 1.0077        | 1.0075         |
| $\angle(\text{C4-C3a-C7a})$ | 122.32          | 122.48           | 122.47        | 122.46      | 122.47      | 122.11        | 122.21         |
| $\angle(\text{C3a-C7a-C7})$ | 122.18          | 121.97           | 121.96        | 121.97      | 121.95      | 122.15        | 122.13         |
| $\angle(\text{C6-C7-C7a})$  | 116.19          | 116.38           | 116.38        | 116.37      | 116.39      | 116.42        | 116.35         |
| $\angle(\text{C5-C6-C7})$   | 122.09          | 121.91           | 121.91        | 121.95      | 121.91      | 122.15        | 122.12         |
| $\angle(\text{C3-C3a-C4})$  | 128.70          | 128.62           | 128.63        | 128.66      | 128.63      | 128.82        | 128.74         |
| $\angle(\text{C1-C7a-C3a})$ | 107.78          | 107.96           | 107.96        | 107.89      | 107.96      | 107.80        | 107.75         |
| $\angle(\text{N2-C3-C3a})$  | 105.24          | 105.25           | 105.23        | 105.30      | 105.22      | 105.32        | 105.29         |
| $\angle(\text{H2-N2-C3})$   | 123.54          | 123.61           | 123.59        | 123.63      | 123.59      | 123.60        | 123.65         |
| $\angle(\text{O1=C1-C7a})$  | 129.36          | 129.44           | 129.47        | 129.47      | 129.48      | 129.51        | 129.59         |
| $\angle(\text{O3=C3-C3a})$  | 128.77          | 128.59           | 128.61        | 128.54      | 128.62      | 128.95        | 128.89         |

|                            |         |         |         |         |         |         |         |
|----------------------------|---------|---------|---------|---------|---------|---------|---------|
| $\angle(\text{H7-C7-C7a})$ | 121.70  | 121.46  | 121.47  | 121.50  | 121.47  | 121.65  | 121.64  |
| $\angle(\text{H6-C6-C7})$  | 119.43  | 119.62  | 119.62  | 119.60  | 119.63  | 119.33  | 119.40  |
| $\angle(\text{H5-C5-C6})$  | 119.52  | 119.30  | 119.31  | 119.31  | 119.30  | 119.54  | 119.50  |
| $\angle(\text{N4-C4-C3a})$ | 121.42  | 121.40  | 121.41  | 121.37  | 121.39  | 121.43  | 121.39  |
| $\angle(\text{H9-N4-C4})$  | 116.29  | 117.14  | 116.83  | 117.55  | 116.84  | 119.55  | 118.42  |
| $\angle(\text{H8-N4-C4})$  | 114.70  | 115.44  | 115.16  | 115.86  | 115.14  | 117.71  | 116.66  |
| $\tau(\text{C4C3aC7aC7})$  | -0.33   | -0.29   | -0.29   | -0.34   | -0.34   | -0.28   | -0.24   |
| $\tau(\text{C3aC7aC7C6})$  | -0.19   | -0.19   | -0.20   | -0.15   | -0.19   | -0.13   | -0.14   |
| $\tau(\text{C7aC7C6C5})$   | 0.43    | 0.41    | 0.42    | 0.39    | 0.44    | 0.27    | 0.29    |
| $\tau(\text{C3C3aC4C5})$   | -177.84 | -177.97 | -177.89 | -178.12 | -177.97 | -178.55 | -178.57 |
| $\tau(\text{C1C7aC3aC4})$  | -179.53 | -179.52 | -179.48 | -179.58 | -179.56 | -179.72 | -179.80 |
| $\tau(\text{N2C3C3aC4})$   | 179.61  | 179.60  | 179.57  | 179.66  | 179.66  | 179.73  | 179.66  |
| $\tau(\text{H2N2C3C3a})$   | -179.51 | -179.57 | -179.52 | -179.58 | -179.54 | -179.75 | -179.77 |
| $\tau(\text{O1C1C7aC3a})$  | -179.88 | -179.89 | -179.90 | -179.92 | -179.90 | -179.93 | -179.83 |
| $\tau(\text{O3C3C3aC4})$   | 0.27    | 0.16    | 0.16    | 0.22    | 0.25    | 0.16    | 0.14    |
| $\tau(\text{H7C7C7aC3a})$  | -179.86 | -179.88 | -179.88 | -179.87 | -179.87 | -179.89 | -179.56 |
| $\tau(\text{H6C6C7C7a})$   | -179.75 | -179.75 | -179.74 | -179.76 | -179.74 | -179.79 | -179.66 |
| $\tau(\text{H5C5C6C7})$    | 179.38  | 179.45  | 179.43  | 179.48  | 179.41  | 179.65  | 179.40  |
| $\tau(\text{N4C4C3aC7a})$  | -176.30 | -176.52 | -176.39 | -176.70 | -176.36 | -177.72 | -177.24 |
| $\tau(\text{H9N4C4C3a})$   | -155.43 | -157.85 | -157.01 | -158.82 | -156.94 | -165.35 | -164.86 |
| $\tau(\text{H8N4C4C3a})$   | -17.03  | -15.96  | -16.53  | -15.14  | -16.44  | -10.56  | -11.23  |

Table S5. Calculated harmonic vibrational frequencies (in  $\text{cm}^{-1}$ ) of 3-ApI molecule in comparison with experimental IR spectrum measured in the range 0-3800  $\text{cm}^{-1}$  for the solid sample.

| N° | Exp. (IR) | B3LYP/<br>cc-pVTZ <sup>a</sup> | MP2/<br>cc-pVTZ <sup>a</sup> | Approximate description of<br>vibrational modes <sup>b</sup>                                                                                     |
|----|-----------|--------------------------------|------------------------------|--------------------------------------------------------------------------------------------------------------------------------------------------|
| 1  | 349       | 111(1)                         | 110(1)                       | twistL(N <sub>2</sub> -H)                                                                                                                        |
| 2  |           | 151(2)                         | 175(3)                       | fold(C <sub>3a</sub> -C <sub>7a</sub> )                                                                                                          |
| 3  |           | 180(8)                         | 146(1)                       | oop(N <sub>2</sub> ), fold(C <sub>3a</sub> -C <sub>7a</sub> )                                                                                    |
| 4  |           | 215(3)                         | 212(1)                       | $\phi(\text{C}_4\text{C}_3\text{C}_3)$ , $\phi(\text{C}_7\text{C}_7\text{C}_1)$ , $\phi(\text{HN}_4\text{H})$                                    |
| 5  |           | 239(4)                         | 237(5)                       | fold(C <sub>5</sub> ...C <sub>3a</sub> )                                                                                                         |
| 6  |           | 295(189)                       | 402(129)                     | oop(C <sub>4</sub> -N <sub>4</sub> ), $\phi(\text{CN}_4\text{H})$ , inv(NH <sub>2</sub> )                                                        |
| 7  |           | 333(21)                        | 330(10)                      | $\phi(\text{C}_7\text{aC}_1\text{O}_1)$ , $\phi(\text{N}_2\text{C}_1\text{O}_1)$ , $\phi(\text{CCN}_4)$ ,<br>r(C <sub>7a</sub> -C <sub>1</sub> ) |
| 8  | 409       | 394(1)                         | 386(9)                       | $\phi(\text{C}_3\text{aC}_4\text{N}_4)$ , $\phi(\text{C}_3\text{aC}_3\text{O}_3)$                                                                |
| 9  |           | 471(2)                         | 459(1)                       | oop(C <sub>3a</sub> -C <sub>7a</sub> , C <sub>6</sub> -C <sub>5</sub> ) twistL(N <sub>2</sub> -H)                                                |
| 10 | 499       | 499(6)                         | 493(8)                       | $\phi(\text{C}_5\text{C}_4\text{C}_3\text{a})$ , $\phi(\text{C}_5\text{C}_4\text{N}_4)$ , def(Bz+Py),                                            |
| 11 |           | 532(41)                        | 574(115)                     | tors(C <sub>4</sub> -N <sub>4</sub> )                                                                                                            |
| 12 | 550       | 547(92)                        | 539(50)                      | oop(H <sub>2</sub> )                                                                                                                             |
| 13 |           | 554(10)                        | 548(1)                       | ip(C <sub>4</sub> , N-H <sub>2</sub> ), bend(Bz+Py)                                                                                              |
| 14 |           | 568(1)                         | 530(134)                     | oop(C <sub>4</sub> , C <sub>7a</sub> , H <sub>2</sub> ), tors(C <sub>4</sub> -N <sub>4</sub> )                                                   |
| 15 | 643       | 645(9)                         | 642(5)                       | $\phi(\text{CN}_2\text{C})$ , $\phi(\text{CCN}_2)$                                                                                               |
| 16 | 663       | 666(28)                        | 663(17)                      | $\phi(\text{CCO}_3)$ , $\phi(\text{NCO}_3)$                                                                                                      |
| 17 | 682       | 691(4)                         | 687(6)                       | $\phi(\text{CCO}_1)$ , $\phi(\text{NCO}_1)$                                                                                                      |
| 18 | 688       | 697(5)                         | 673(3)                       | oop(C <sub>4</sub> , C <sub>6</sub> , C <sub>3</sub> ), bend(Bz+Py)                                                                              |
| 19 | 744       | 766(51)                        | 754(41)                      | oop(C <sub>7</sub> , C <sub>6</sub> , C <sub>1</sub> ), bend(Bz+Py)                                                                              |
| 20 | 782       | 800(3)                         | 804(1)                       | $\phi(\text{C}_7\text{C}_6\text{C}_5)$ , r(C <sub>3a</sub> -C <sub>3</sub> )                                                                     |
| 21 | 788       | 809(1)                         | 786(2)                       | oop(C <sub>6</sub> , C <sub>5</sub> , C <sub>3</sub> , C <sub>1</sub> )                                                                          |
| 22 | 818       | 843(10)                        | 808(20)                      | oop(C-H, C=O)                                                                                                                                    |
| 23 | 894       | 909(~0)                        | 903(~0)                      | oop(C <sub>7</sub> , C <sub>5</sub> )                                                                                                            |
| 24 | 955       | 971(4)                         | 974(1)                       | r(C-N <sub>4</sub> ), r(C <sub>4</sub> -C <sub>5</sub> ), $\phi(\text{C}_7\text{aC}_7\text{C}_6)$                                                |
| 25 | 1029      | 996(~0)                        | 964(~0)                      | oop(C-H), bend(Bz)                                                                                                                               |
| 26 |           | 1041(70)                       | 1048(21)                     | r(C-C) <sub>Bz</sub> , r(C-C) <sub>Py</sub>                                                                                                      |
| 27 | 1055      | 1050(48)                       | 1066(93)                     | r(C-N <sub>2</sub> ), r(C-C) <sub>Bz</sub>                                                                                                       |
| 28 |           | 1119(13)                       | 1137(21)                     | $\phi(\text{CN}_4\text{H})$ , $\phi(\text{CCH}_5)$                                                                                               |
| 29 | 1156      | 1177(23)                       | 1192(4)                      | $\phi(\text{CCH}_6)$ , $\phi(\text{CCH}_7)$                                                                                                      |
| 30 | 1181      | 1195(7)                        | 1184(13)                     | $\phi(\text{CCH}_7)$ , r(C-N <sub>2</sub> )                                                                                                      |
| 31 |           | 1293(5)                        | 1298(3)                      | $\phi(\text{CCH})$ , def(Py+Pz)                                                                                                                  |
| 32 |           | 1319(327)                      | 1360(296)                    | def(Py+Pz)                                                                                                                                       |
| 33 | 1314      | 1340(11)                       | 1333(32)                     | $\phi(\text{CCH}_2)$ , r(C-N <sub>2</sub> )                                                                                                      |
| 34 |           | 1362(25)                       | 1353(49)                     | r(C-N <sub>4</sub> ), $\phi(\text{CCH}_5)$                                                                                                       |
| 35 | 1422      | 1420(25)                       | 1516(9)                      | r(C-C) <sub>Py</sub> , r(C-C) <sub>Bz</sub>                                                                                                      |
| 36 | 1484      | 1486(3)                        | 1483(10)                     | r(C <sub>3a</sub> -C <sub>7a</sub> ), $\phi(\text{CCH}_7)$                                                                                       |
| 37 | 1593      | 1520(48)                       | 1528(54)                     | r(C <sub>4</sub> -N <sub>4</sub> ), r(C <sub>4</sub> -C <sub>5</sub> ), r(C <sub>7a</sub> -C <sub>7</sub> ),<br>$\phi(\text{CCH})$               |
| 38 | 1636      | 1623(58)                       | 1633(71)                     | $\phi(\text{HN}_4\text{H})$ , $\phi(\text{CN}_4\text{H})$                                                                                        |
| 39 | 1721      | 1647(23)                       | 1658(2)                      | r(C <sub>7a</sub> -C <sub>7</sub> ), r(C <sub>4</sub> -C <sub>3a</sub> ), r(C <sub>5</sub> -C <sub>4</sub> ),<br>$\phi(\text{HN}_4\text{H})$     |
| 40 | 1732      | 1671(234)                      | 1691(172)                    | r(C <sub>4</sub> -C <sub>3a</sub> ), r(C <sub>4</sub> -N <sub>4</sub> ), $\phi(\text{HN}_4\text{H})$                                             |
| 41 | 1748      | 1777(630)                      | 1792(570)                    | r(C <sub>3</sub> =O <sub>3</sub> ), r(C <sub>1</sub> =O <sub>1</sub> )                                                                           |

|    |      |           |           |                                                                        |
|----|------|-----------|-----------|------------------------------------------------------------------------|
| 42 |      | 1822(252) | 1818(144) | r(C <sub>3</sub> =O <sub>3</sub> ), r(C <sub>1</sub> =O <sub>1</sub> ) |
| 43 |      | 3164(7)   | 3203(5)   | r(C-H <sub>6</sub> ), r(C-H <sub>7</sub> )                             |
| 44 | 2722 | 3182(13)  | 3223(7)   | r(C-H)                                                                 |
| 45 |      | 3209(2)   | 3246(2)   | r(C-H <sub>6</sub> ), r(C-H <sub>5</sub> )                             |
| 46 | 3209 | 3565(66)  | 3572(60)  | r(N <sub>4</sub> -H <sub>8</sub> ), r(N <sub>4</sub> -H <sub>9</sub> ) |
| 47 | 3360 | 3635(91)  | 3657(113) | r(N <sub>2</sub> -H <sub>2</sub> )                                     |
| 48 | 3489 | 3701(50)  | 3714(50)  | r(N <sub>4</sub> -H <sub>9</sub> ), r(N <sub>4</sub> -H <sub>8</sub> ) |

<sup>a</sup> Calculated band intensities (in km mol<sup>-1</sup>) are given in parentheses.

<sup>b</sup> Approximate description of vibrational modes is carried out according to potential energy distribution (PED). First coordinate has the largest contribution to the potential energy; coordinates contributed by less than 7% are omitted. Notations of coordinates: r and  $\phi$  are changes of the bond lengths and angles, respectively; def (Bz) is planar deformation of the benzene ring; bend (Bz) is out-of-plane deformation of benzene ring; oop – out-of-plane coordinate of atom or bond; ip – in-plane coordinate of atom or bond; twistL - twisting around the axis indicated in parentheses; fold - folding along the bond given in parentheses; tors - torsion around the bond given in parentheses; inv(NH<sub>2</sub>) – inversion of amino group. Previous measurements of experimental IR spectra of solid 3-APhI (Savelyev, D.S., Islyaikin, M.K., Girichev, G.V., *Izv. Vys. Uch. Zav., Khim. Khim. Tekhnol.* 2016, **59**(3), 35-42) were carried out with lower resolution and, therefore, they are re-investigated in the present work.

Table S6. Complete equilibrium molecular structures of 3-APhI (bond lengths in Å, bond angles and dihedral angles in degrees) derived from GED data ( $r_e^{se}$ ) and coupled-cluster computations ( $r_e^{BO}$ )

| Parameters          | $r_{hl}^{se}$ a,b      | $r_e^{se}$ a,c         | $r_e^{se}$ a,d         | $r_e^{BO}$ e       |
|---------------------|------------------------|------------------------|------------------------|--------------------|
| r(C–C) <sup>f</sup> | 1.403 <sub>2</sub>     | 1.393 <sub>5</sub>     | 1.393 <sub>5</sub>     | 1.393 <sub>8</sub> |
| r(C3a–C7a)          | 1.401(3) <sup>1</sup>  | 1.392(3)               | 1.392(3) <sup>1</sup>  | 1.392 <sub>4</sub> |
| r(C4–C3a)           | 1.400(3) <sup>1</sup>  | 1.391(3)               | 1.391(3) <sup>1</sup>  | 1.391 <sub>3</sub> |
| r(C5–C4)            | 1.419(3) <sup>1</sup>  | 1.410(3)               | 1.410(3) <sup>1</sup>  | 1.409 <sub>6</sub> |
| r(C6–C5)            | 1.398(3) <sup>1</sup>  | 1.389(3)               | 1.389(3) <sup>1</sup>  | 1.388 <sub>9</sub> |
| r(C7–C6)            | 1.412(3) <sup>1</sup>  | 1.403(3)               | 1.403(3) <sup>1</sup>  | 1.402 <sub>9</sub> |
| r(C7a–C7)           | 1.387(3) <sup>1</sup>  | 1.378(3)               | 1.378(3) <sup>1</sup>  | 1.377 <sub>6</sub> |
| r(N2–C1)            | 1.401(3) <sup>2</sup>  | 1.398(3) <sup>2</sup>  | 1.397(3) <sup>2</sup>  | 1.397 <sub>7</sub> |
| r(N2–C3)            | 1.395(3) <sup>2</sup>  | 1.392(3) <sup>2</sup>  | 1.391(3) <sup>2</sup>  | 1.392 <sub>1</sub> |
| r(N4–C4)            | 1.377(3) <sup>3</sup>  | 1.375(3) <sup>3</sup>  | 1.370(3) <sup>3</sup>  | 1.371 <sub>4</sub> |
| r(C1–C7a)           | 1.500(5) <sup>4</sup>  | 1.496(5) <sup>4</sup>  | 1.492(5) <sup>4</sup>  | 1.493 <sub>9</sub> |
| r(C3–C3a)           | 1.480(5) <sup>4</sup>  | 1.476(5) <sup>4</sup>  | 1.472(5) <sup>4</sup>  | 1.473 <sub>7</sub> |
| r(O1=C1)            | 1.205(3) <sup>5</sup>  | 1.203(3) <sup>5</sup>  | 1.205(3) <sup>5</sup>  | 1.204 <sub>9</sub> |
| r(C3=O3)            | 1.213(3) <sup>5</sup>  | 1.211(3) <sup>5</sup>  | 1.213(3) <sup>5</sup>  | 1.212 <sub>9</sub> |
| r(N2–H2)            | 1.005 <sup>g</sup>     | 1.005 <sup>g</sup>     | 1.005 <sup>g</sup>     | 1.005 <sub>3</sub> |
| r(N4–H8)            | 1.064(62) <sup>6</sup> | 1.060(60) <sup>6</sup> | 1.063(60) <sup>6</sup> | 1.007 <sub>8</sub> |



|                             |                           |                            |                           |                    |
|-----------------------------|---------------------------|----------------------------|---------------------------|--------------------|
| $r(\text{N4-H9})$           | 1.060(62) <sup>6</sup>    | 1.056(60) <sup>6</sup>     | 1.059(60) <sup>6</sup>    | 1.003 <sub>5</sub> |
| $r(\text{C5-H5})$           | 1.082 <sup>g</sup>        | 1.082 <sup>g</sup>         | 1.082 <sup>g</sup>        | 1.082 <sub>4</sub> |
| $r(\text{C6-H6})$           | 1.081 <sup>g</sup>        | 1.081 <sup>g</sup>         | 1.081 <sup>g</sup>        | 1.081 <sub>3</sub> |
| $r(\text{C7-H7})$           | 1.080 <sup>g</sup>        | 1.080 <sup>g</sup>         | 1.080 <sup>g</sup>        | 1.079 <sub>5</sub> |
| $\angle(\text{C3-N2-C1})$   | 113.46(21) <sup>7</sup>   | 112.80(18) <sup>7</sup>    | 112.82(17) <sup>7</sup>   | 112.9 <sub>9</sub> |
| $\angle(\text{C7a-C1-N2})$  | 105.22(22) <sup>8</sup>   | 105.51(18) <sup>8</sup>    | 105.38(19) <sup>8</sup>   | 104.9 <sub>9</sub> |
| $\angle(\text{C3a-C3-N2})$  | 104.62(22) <sup>h</sup>   | 105.14(18) <sup>h</sup>    | 105.25(21) <sup>h</sup>   | 105.3 <sub>2</sub> |
| $\angle(\text{O1=C1-N2})$   | 125.99(31) <sup>9</sup>   | 125.45(21) <sup>9</sup>    | 125.50(29) <sup>9</sup>   | 125.6 <sub>9</sub> |
| $\angle(\text{O3=C3-N2})$   | 126.29(31) <sup>9</sup>   | 125.75(21) <sup>9</sup>    | 125.80(29) <sup>9</sup>   | 125.9 <sub>9</sub> |
| $\angle(\text{C4-C3a-C3})$  | 129.21(49) <sup>10</sup>  | 128.65(33) <sup>10</sup>   | 128.62(46) <sup>10</sup>  | 128.7 <sub>2</sub> |
| $\angle(\text{C7-C7a-C1})$  | 130.38(52) <sup>11</sup>  | 130.11(40) <sup>11</sup>   | 130.16(50) <sup>11</sup>  | 130.0 <sub>7</sub> |
| $\angle(\text{C4-C3a-C7a})$ | 121.13(74) <sup>h</sup>   | 121.77(39) <sup>h</sup>    | 122.08(46) <sup>h</sup>   | 122.2 <sub>8</sub> |
| $\angle(\text{C5-C4-C3a})$  | 116.33(48) <sup>h</sup>   | 115.46(39) <sup>h</sup>    | 115.38(38) <sup>h</sup>   | 115.7 <sub>7</sub> |
| $\angle(\text{C6-C5-C4})$   | 122.37(85) <sup>h</sup>   | 122.50(75) <sup>h</sup>    | 122.29(80) <sup>h</sup>   | 121.4 <sub>4</sub> |
| $\angle(\text{C7-C6-C5})$   | 120.40(70) <sup>h</sup>   | 121.16(66) <sup>h</sup>    | 121.40(68) <sup>h</sup>   | 122.1 <sub>2</sub> |
| $\angle(\text{C7a-C7-C6})$  | 117.18(42) <sup>12</sup>  | 116.28(31) <sup>12</sup>   | 116.27(33) <sup>12</sup>  | 116.1 <sub>7</sub> |
| $\angle(\text{N4-C4-C5})$   | 122.17(49) <sup>13</sup>  | 122.64(30) <sup>13</sup>   | 122.86(29) <sup>13</sup>  | 122.7 <sub>9</sub> |
| $\angle(\text{C3a-C7a-C7})$ | 122.68(62) <sup>h</sup>   | 122.83(46) <sup>h</sup>    | 122.57(58) <sup>h</sup>   | 122.2 <sub>2</sub> |
| $\angle(\text{C6-C5-H5})$   | 119.53 <sup>g</sup>       | 119.53 <sup>g</sup>        | 119.53 <sup>g</sup>       | 119.5 <sub>3</sub> |
| $\angle(\text{C7-C6-H6})$   | 119.39 <sup>g</sup>       | 119.39 <sup>g</sup>        | 119.39 <sup>g</sup>       | 119.3 <sub>9</sub> |
| $\angle(\text{C7a-C7-H7})$  | 121.72 <sup>g</sup>       | 121.72 <sup>g</sup>        | 121.72 <sup>g</sup>       | 121.7 <sub>2</sub> |
| $\angle(\text{C1-N2-H2})$   | 123.40 <sup>g</sup>       | 123.40 <sup>g</sup>        | 123.40 <sup>g</sup>       | 123.4 <sub>0</sub> |
| $\angle(\text{C4-N4-H8})$   | 109.41(308) <sup>14</sup> | 112.98(197) <sup>14</sup>  | 116.17(208) <sup>14</sup> | 115.6 <sub>9</sub> |
| $\angle(\text{C4-N4-H9})$   | 111.03(308) <sup>14</sup> | 114.60(197) <sup>14</sup>  | 117.79(208) <sup>14</sup> | 117.3 <sub>1</sub> |
| $\tau(\text{C6C5C4N4})$     | 179.43(705) <sup>15</sup> | -179.24(854) <sup>15</sup> | 179.54(648) <sup>15</sup> | 177.2 <sub>4</sub> |
| $\tau(\text{O3=C3N2C1})$    | 178.74 <sup>g</sup>       | 178.74 <sup>g</sup>        | 178.74 <sup>g</sup>       | 178.7 <sub>4</sub> |
| $\tau(\text{O1=C1N2C3})$    | -179.57 <sup>g</sup>      | -179.57 <sup>g</sup>       | -179.57 <sup>g</sup>      | -179.57            |
| $\tau(\text{C7aC1N2C3})$    | -0.677 <sup>g</sup>       | -0.677 <sup>g</sup>        | -0.677 <sup>g</sup>       | -0.677             |
| $\tau(\text{C3N2C1H2})$     | -178.94 <sup>g</sup>      | -178.94 <sup>g</sup>       | -178.94 <sup>g</sup>      | -178.94            |
| $\tau(\text{C3aC3C7aC1})$   | 179.29 <sup>g</sup>       | 179.29 <sup>g</sup>        | 179.29 <sup>g</sup>       | 179.29             |
| $\tau(\text{C7C7aC1N2})$    | -178.87 <sup>g</sup>      | -178.87 <sup>g</sup>       | -178.87 <sup>g</sup>      | -178.87            |
| $\tau(\text{C4C3aC3N2})$    | 179.63 <sup>g</sup>       | 179.63 <sup>g</sup>        | 179.63 <sup>g</sup>       | 179.63             |

|                                     |                            |                            |                            |                    |
|-------------------------------------|----------------------------|----------------------------|----------------------------|--------------------|
| $\tau(\text{C6C7C7aC3a})$           | -0.15 <sup>g</sup>         | -0.15 <sup>g</sup>         | -0.15 <sup>g</sup>         | -0.15              |
| $\tau(\text{C5C4C6C7})$             | 0.58 <sup>g</sup>          | 0.58 <sup>g</sup>          | 0.58 <sup>g</sup>          | 0.58               |
| $\tau(\text{C3aC7aC7H7})$           | -179.87 <sup>g</sup>       | -179.87 <sup>g</sup>       | -179.87 <sup>g</sup>       | -179.87            |
| $\tau(\text{C7aC7C6H6})$            | -179.78 <sup>g</sup>       | -179.78 <sup>g</sup>       | -179.78 <sup>g</sup>       | -179.78            |
| $\tau(\text{C7C6C5H5})$             | 179.47 <sup>g</sup>        | 179.47 <sup>g</sup>        | 179.47 <sup>g</sup>        | 179.47             |
| $\tau(\text{C5C4N4H8})$             | 135.05(2291) <sup>16</sup> | 152.44(1726) <sup>16</sup> | 162.78(1063) <sup>16</sup> | 167.6 <sub>8</sub> |
| $\tau(\text{C5C4N4H9})$             | 38.60(1666) <sup>17</sup>  | 19.12(1189) <sup>17</sup>  | 22.62(775) <sup>17</sup>   | 24.6 <sub>8</sub>  |
| $\Sigma(-\text{NH}_2)$ <sup>i</sup> | 309.28                     | 341.89                     | 347.81                     | 351.9 <sub>7</sub> |
| $R_f$ <sup>j</sup>                  | 3.65                       | 3.51                       | 3.48                       |                    |

<sup>a</sup> Parameters with equal superscripts were refined in one group, differences between parameters in each group were assumed at the values derived from  $r_e^{\text{BO}}$  structure. Uncertainties given in parentheses are estimated as  $\sigma_{\text{tot}} = [(0.002r)^2 + (2.5\sigma_{\text{LS}})^2]^{1/2}$  and  $\sigma_{\text{tot}} = 3\sigma_{\text{LS}}$  for the bond lengths and angles, respectively.

<sup>b</sup> Vibrational corrections to experimental internuclear distances were calculated from the MP2/cc-pVTZ harmonic force field.

<sup>c</sup> Vibrational corrections were calculated with the B3LYP/cc-pVTZ anharmonic force field.

<sup>d</sup> Vibrational corrections were calculated with the MP2/cc-pVTZ anharmonic force field.

<sup>e</sup> Composite structure of CCSD(T)\_ae/cc-pwCVTZ quality (see Eq.1).

<sup>f</sup> Mean value in the benzene ring.

<sup>g</sup> Fixed at the value of the  $r_e^{\text{BO}}$  structure.

<sup>h</sup> Dependent parameter.

<sup>i</sup> Sum of the angles around the N4 atom.

$$R_f = \frac{\sum_i \omega_i(s_i) [s_i M_{\text{exp}}(s_i) - k_M s_i M_{\text{theor}}(s_i)]^2}{\sum_i \omega_i(s_i) [s_i M_{\text{exp}}(s_i)]^2} \text{ in \%}, \omega_i \text{ is a weighting function, } k_M \text{ is a scale factor.}$$

Table S7. Energy  $E^{(2)}$  of donor-acceptor interactions in 3-APhI according to NBO calculations (in kcal mol<sup>-1</sup>, MP2/cc-pVTZ).

| Interaction         | $E^{(2)}$ | Interaction         | $E^{(2)}$ |
|---------------------|-----------|---------------------|-----------|
| LP2(O3)→σ*(C3–N2)   | 36.8      | LP2(O1)→σ*(C1–N2)   | 38.4      |
| LP(N2)→π*(C3=O3)    | 71.6      | LP(N2)→π*(C1=O1)    | 66.2      |
| π(C4–C3a)→π*(C3=O3) | 31.7      | π(C7–C7a)→π*(C1=O1) | 20.7      |
